# Supplementary material for: CTCF is a barrier for 2C-like reprogramming
Source: PubMed Central journal article supplement (PMC8358036; doi:10.1038/s41467-021-25072-x), 2021-08-11
Supplement: 41467_2021_25072_MOESM1_ESM.pdf [file 41467_2021_25072_MOESM1_ESM.pdf]

## **Supplementary Information:**

Supplementary information includes 11 Supplementary Figures and 1 Supplementary Table.

## **CTCF is a Barrier for 2C-like Reprogramming**

Teresa Olbrich et al,

Figure S1

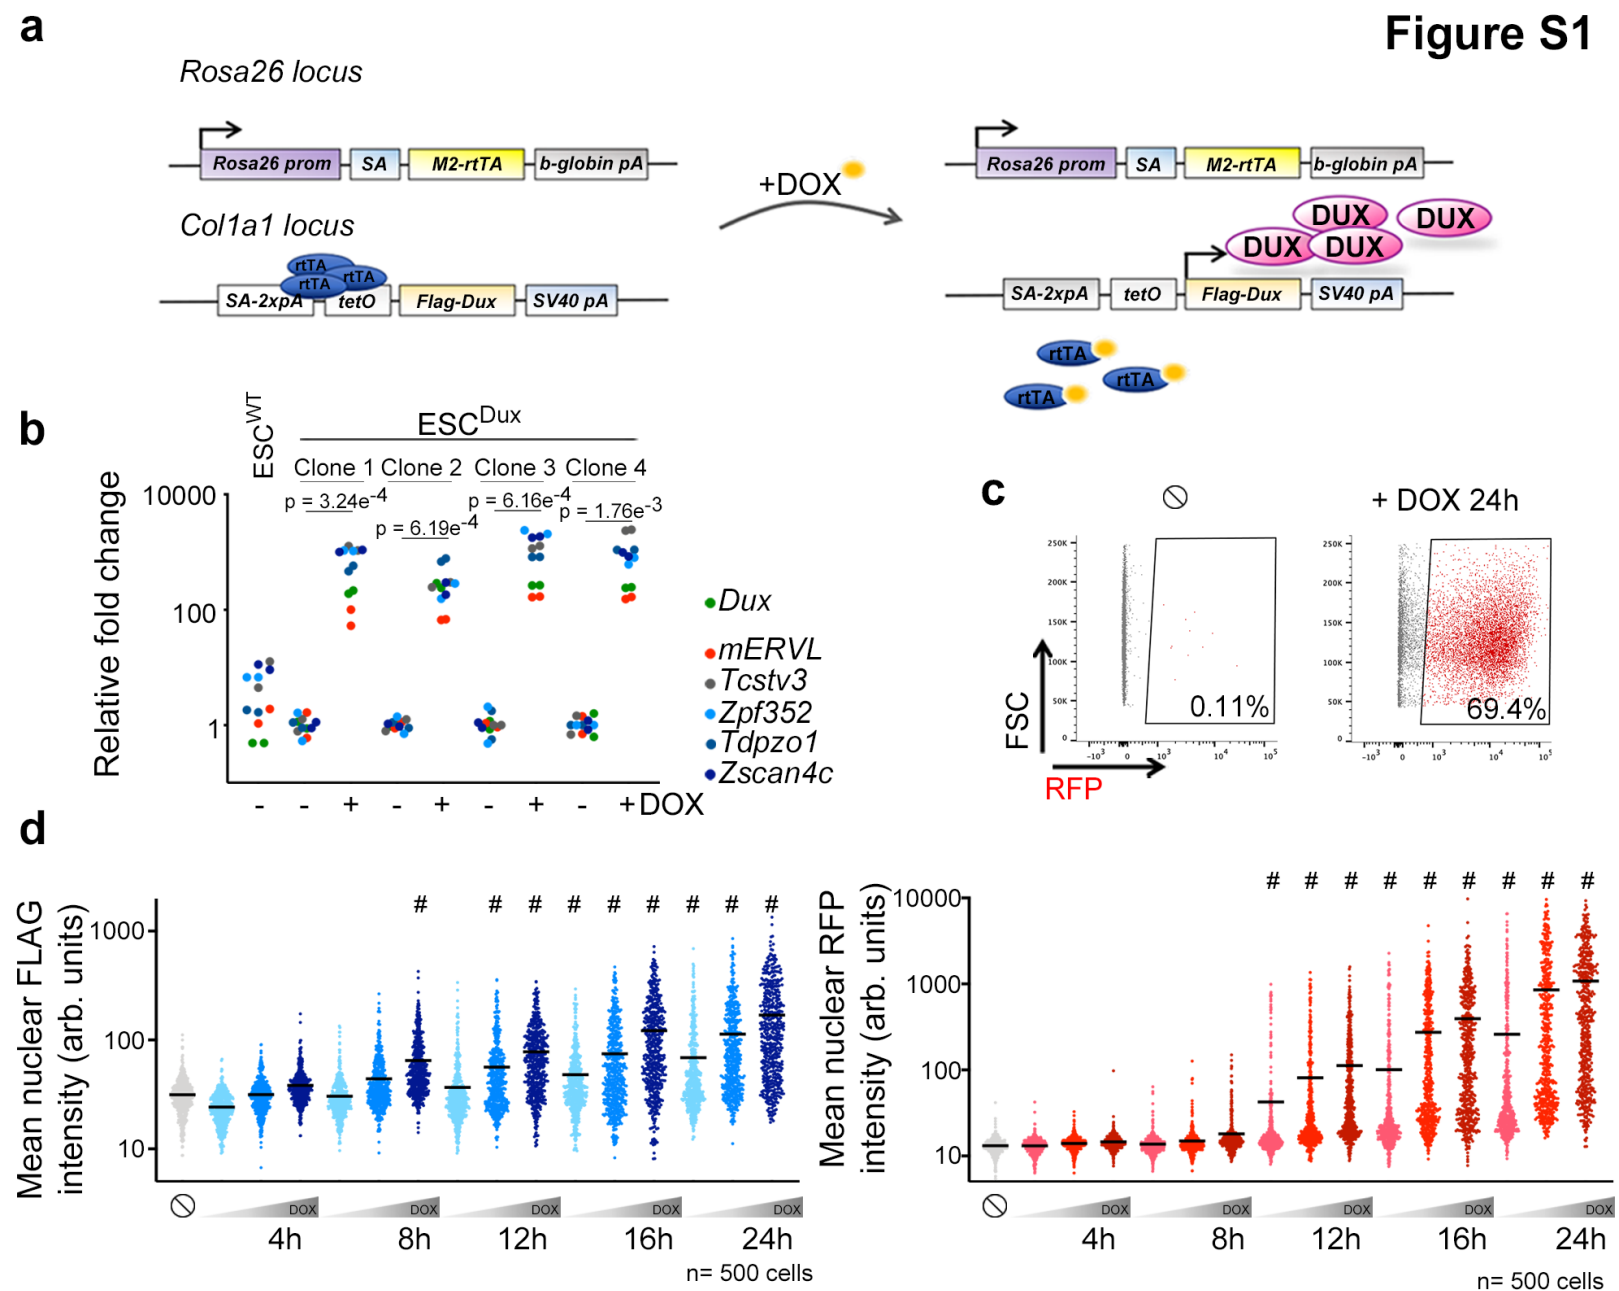

**Supplementary Fig. 1: ESC<sup>DUX</sup> recapitulated all 2C-like features upon DOX-induction. a,** Schematic representation of the two-allele system used to generate ESC<sup>DUX</sup>. DUX cDNA was placed under the control of a tet-responsive sequence (tetO) at the *Col1a1* locus while rtTA is expressed from the *Rosa26* locus<sup>11</sup>. **b,** Graph showing the relative fold change (log<sub>10</sub>) expression of six 2C associated genes in ESC<sup>DUX</sup> untreated or treated with 300ng/ml DOX for 24 hours. Four ESC clones were tested but two were selected for further downstream analyses. Real-time PCR reactions were performed by duplicate and one representative experiment is shown. GAPDH expression was used to normalize gene expression. All genes were considered as a group for statistical analysis. p values are shown from two-tailed paired *t*-tests. **c,** Flow cytometry analysis performed in untreated or DOX-treated (300ng/ml) LTR-RFP reporter ESC<sup>DUX</sup> for 24 hours. Percentages of RFP<sup>+</sup> are included within the plots. ∅=No treatment. **d,** HTI quantification of FLAG (left plot) and RFP (right plot) expression in untreated or dox-treated for the indicated times with different DOX concentrations in *LTR-RFP* reporter ESC<sup>DUX</sup>. Center lines indicate mean values. In **(c, d)**, one representative experiment is shown but at least two independent experiments using multiple clones were performed. n=500; # = p<0.001 in two-tailed unpaired *t*-tests when compared to untreated ESC. DOX concentrations used: 150, 300 and 600 ng/ml.

**Figure S2**

**a**

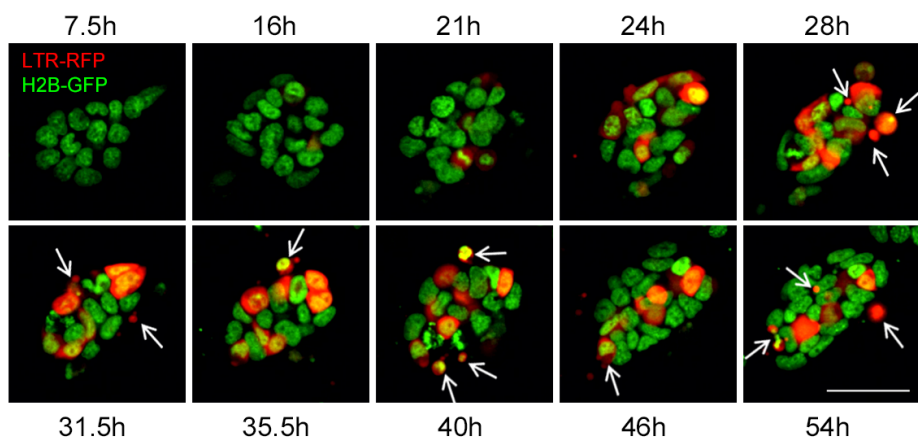

**b**

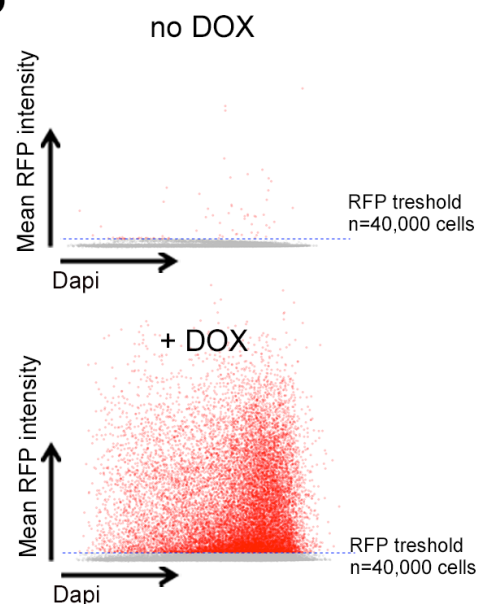

**c**

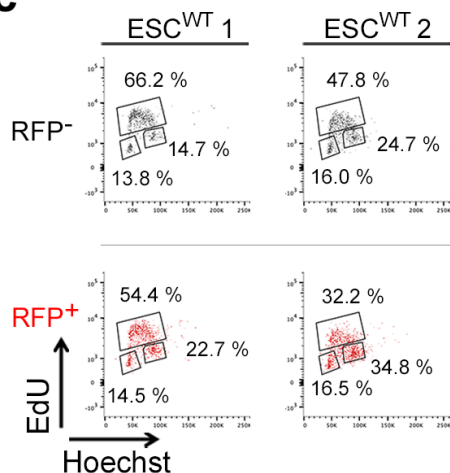

**d**

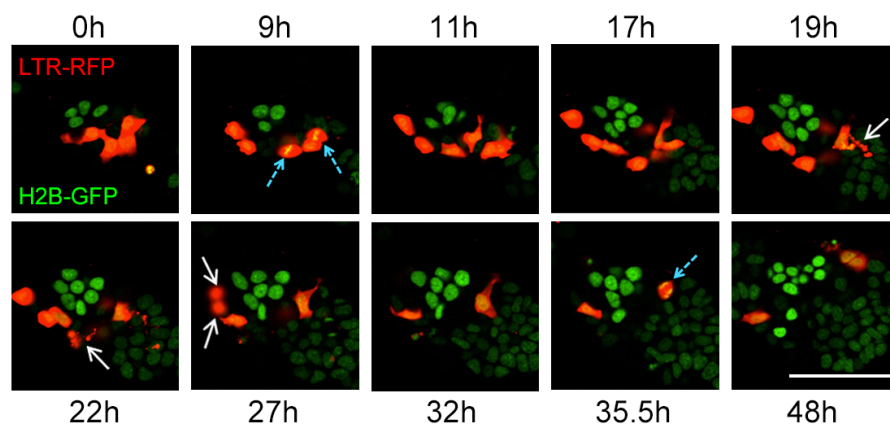

**e**

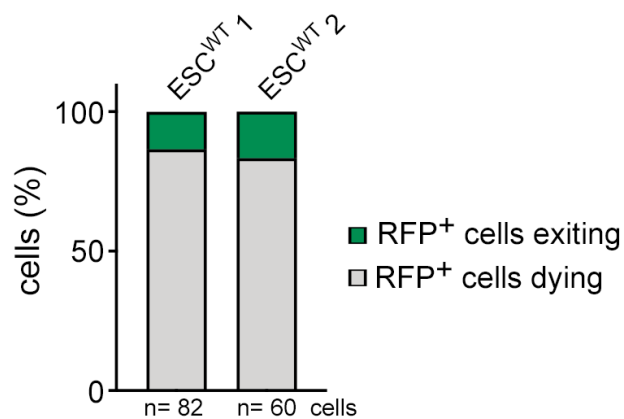

**f**

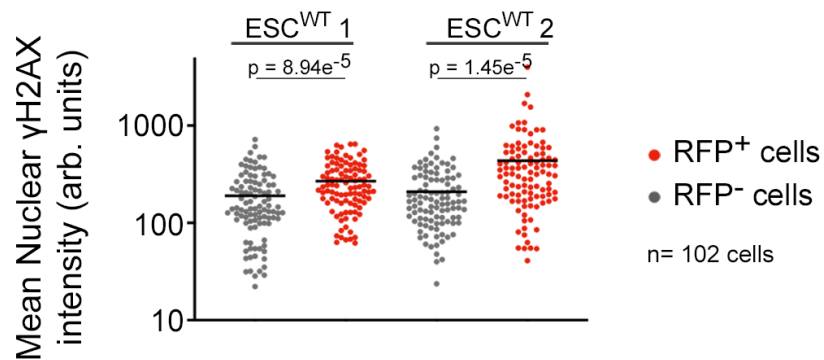

**Supplementary Fig. 2: Endogenous 2C-like cells showed G2 arrest and increased  $\gamma$ H2AX.** **a,** Representative images obtained from a time lapse experiment where LTR-RFP reporter ESC<sup>DUX</sup> expressing H2B-GFP were treated with 300ng/ml DOX and imaged at the indicated timepoints. Scale bar, 100  $\mu$ m. White arrows show dying RFP<sup>+</sup> ESC. Two independent experiments were performed with two ESC clones with similar results but one representative is shown. **b,** Dot plots showing cell distribution based on DNA content and RFP expression in LTR-RFP reporter ESC<sup>DUX</sup> treated with 300ng/ml DOX for 24 hours. **c,** Flow cytometry analysis of the cell cycle distribution in two wild type LTR-RFP reporter ESC lines (R1 and G4 ESC). Cells were split in RFP<sup>-</sup> or RFP<sup>+</sup> subpopulations and percentages for each phase of the cells cycle are included. One representative experiment is shown but at least two independent experiments were performed. **d,** Representative images obtained from a live cell time lapse experiment where LTR-RFP reporter R1 ESC expressing H2B-GFP were followed over time. Indicated times showed the time when recording started. Two independent wild type LTR-RFP reporter ESC lines (R1 and G4) were imaged in two independent experiments but only one representative ESC line (R1) is shown. White arrows showed RFP<sup>+</sup> ESC undergoing cell death. Blue dashed arrows showed RFP<sup>+</sup> ESC undergoing cell division. Scale bar, 100  $\mu$ m. **e,** Plot showing the percentage of endogenous cycling 2C-like cells in two wild-type ESC lines that successfully exit from the totipotent-like state and return to pluripotency or undergo cell death. Quantification was performed by following the fate of a total of 82 and 60 2C-like cells per cell line in the time-lapse experiments from **(d)**. **f,** HTI quantification of  $\gamma$ H2AX in two wild type LTR-RFP reporter ESC lines (R1 and G4 ESC). Cells were split in RFP<sup>-</sup> and RFP<sup>+</sup> subpopulations. Center lines indicate mean values. n=102; p values are

shown from two-tailed unpaired  $t$ -tests. One representative experiment is shown but two independent experiments were performed.

**Figure S3**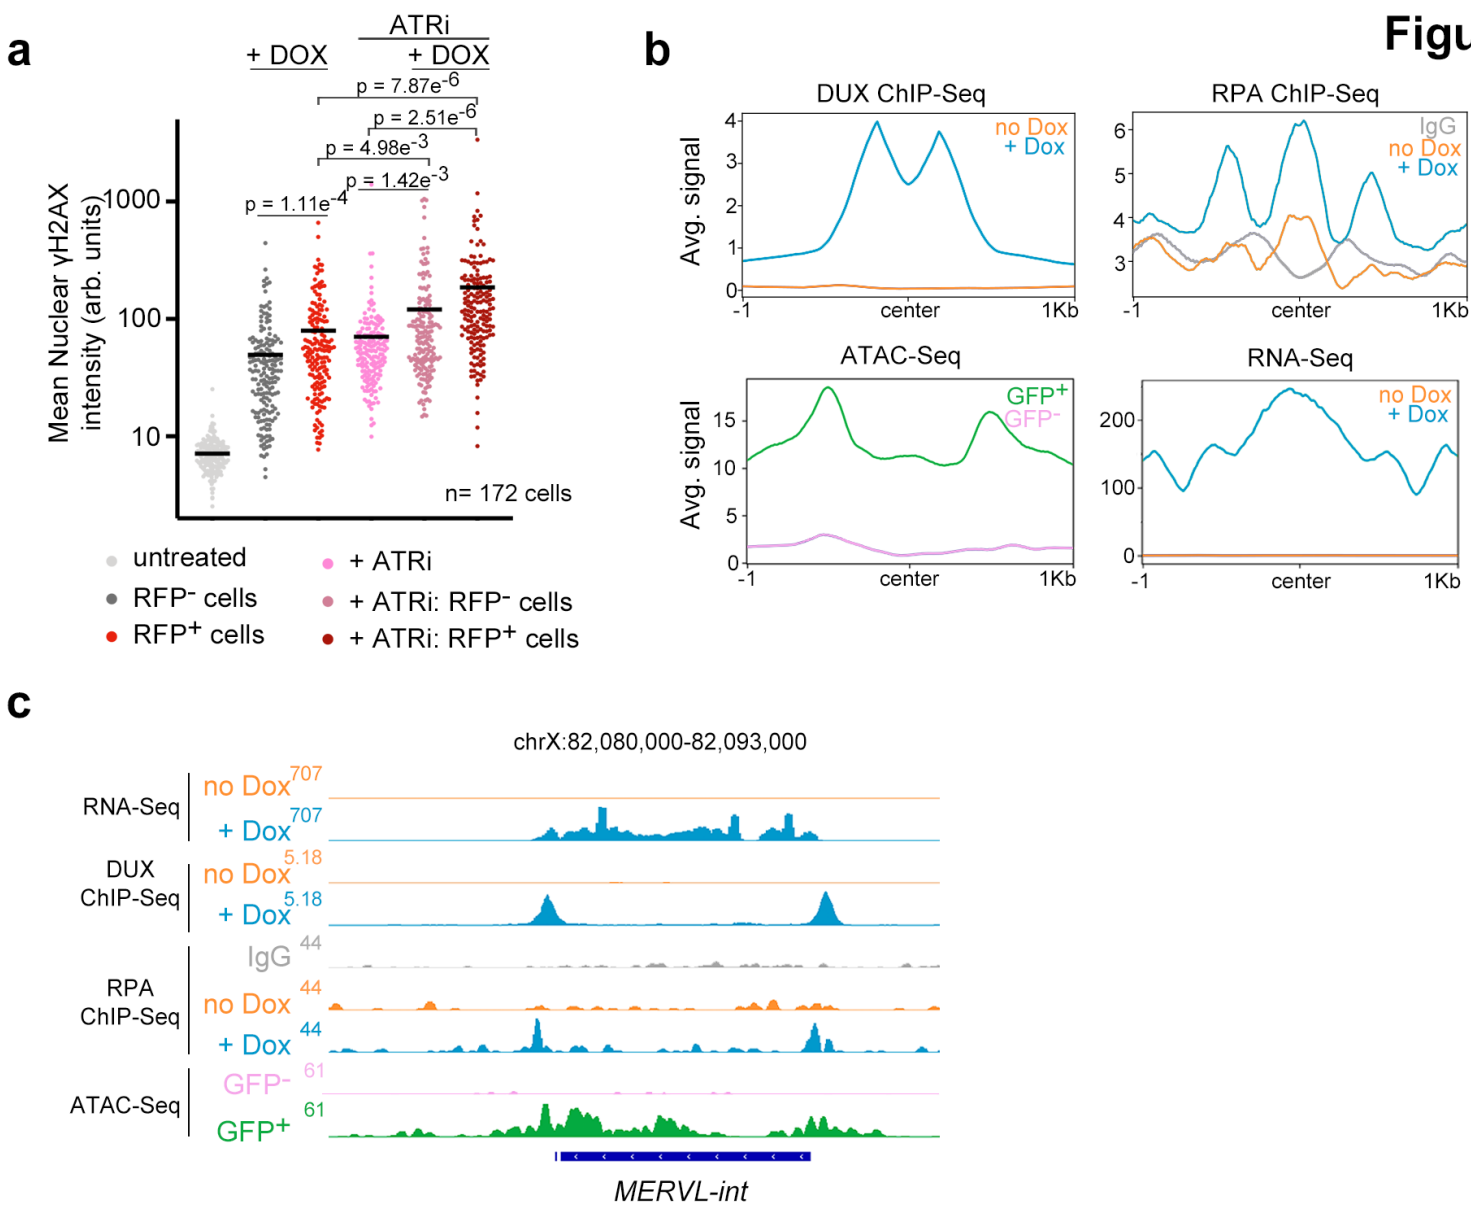

**Supplementary Fig. 3: Transcription-dependent RS induced by DUX expression.** **a**, HTI quantification of  $\gamma$ H2AX in LTR-RFP reporter ESC<sup>DUX</sup> treated with 300ng/ml DOX and/or with 1 $\mu$ M ATR inhibitor (ATRi) for 24 hours. Center lines indicate mean values. Cells were split in RFP<sup>-</sup> or RFP<sup>+</sup> and data is representative of at least two independent experiments performed in two different clones. n=172; p values are shown from two-tailed unpaired *t*-tests. Only statistics for relevant comparisons are shown. **b**, Average read density plots (RPKM) showing RPA, DUX occupancy and RNAseq read counts from untreated or 300ng/ml or 1 $\mu$ g/ml DOX-treated DUX expressing ESC (our data and <sup>5</sup>). ATACseq signal is shown from GFP<sup>-</sup> or GFP<sup>+</sup> cells sorted 1 $\mu$ g/ml DOX-treated LTR-GFP reporter ESC<sup>DUX</sup> <sup>5</sup>. Plots were generated using the 1000 MERVL genomic features with the highest level of bound DUX<sup>5</sup>. **c**, Genome browser tracks showing RPA, DUX occupancy, RNAseq read counts and ATACseq signal in the region surrounding a representative MERVL unit.



**Figure S4**

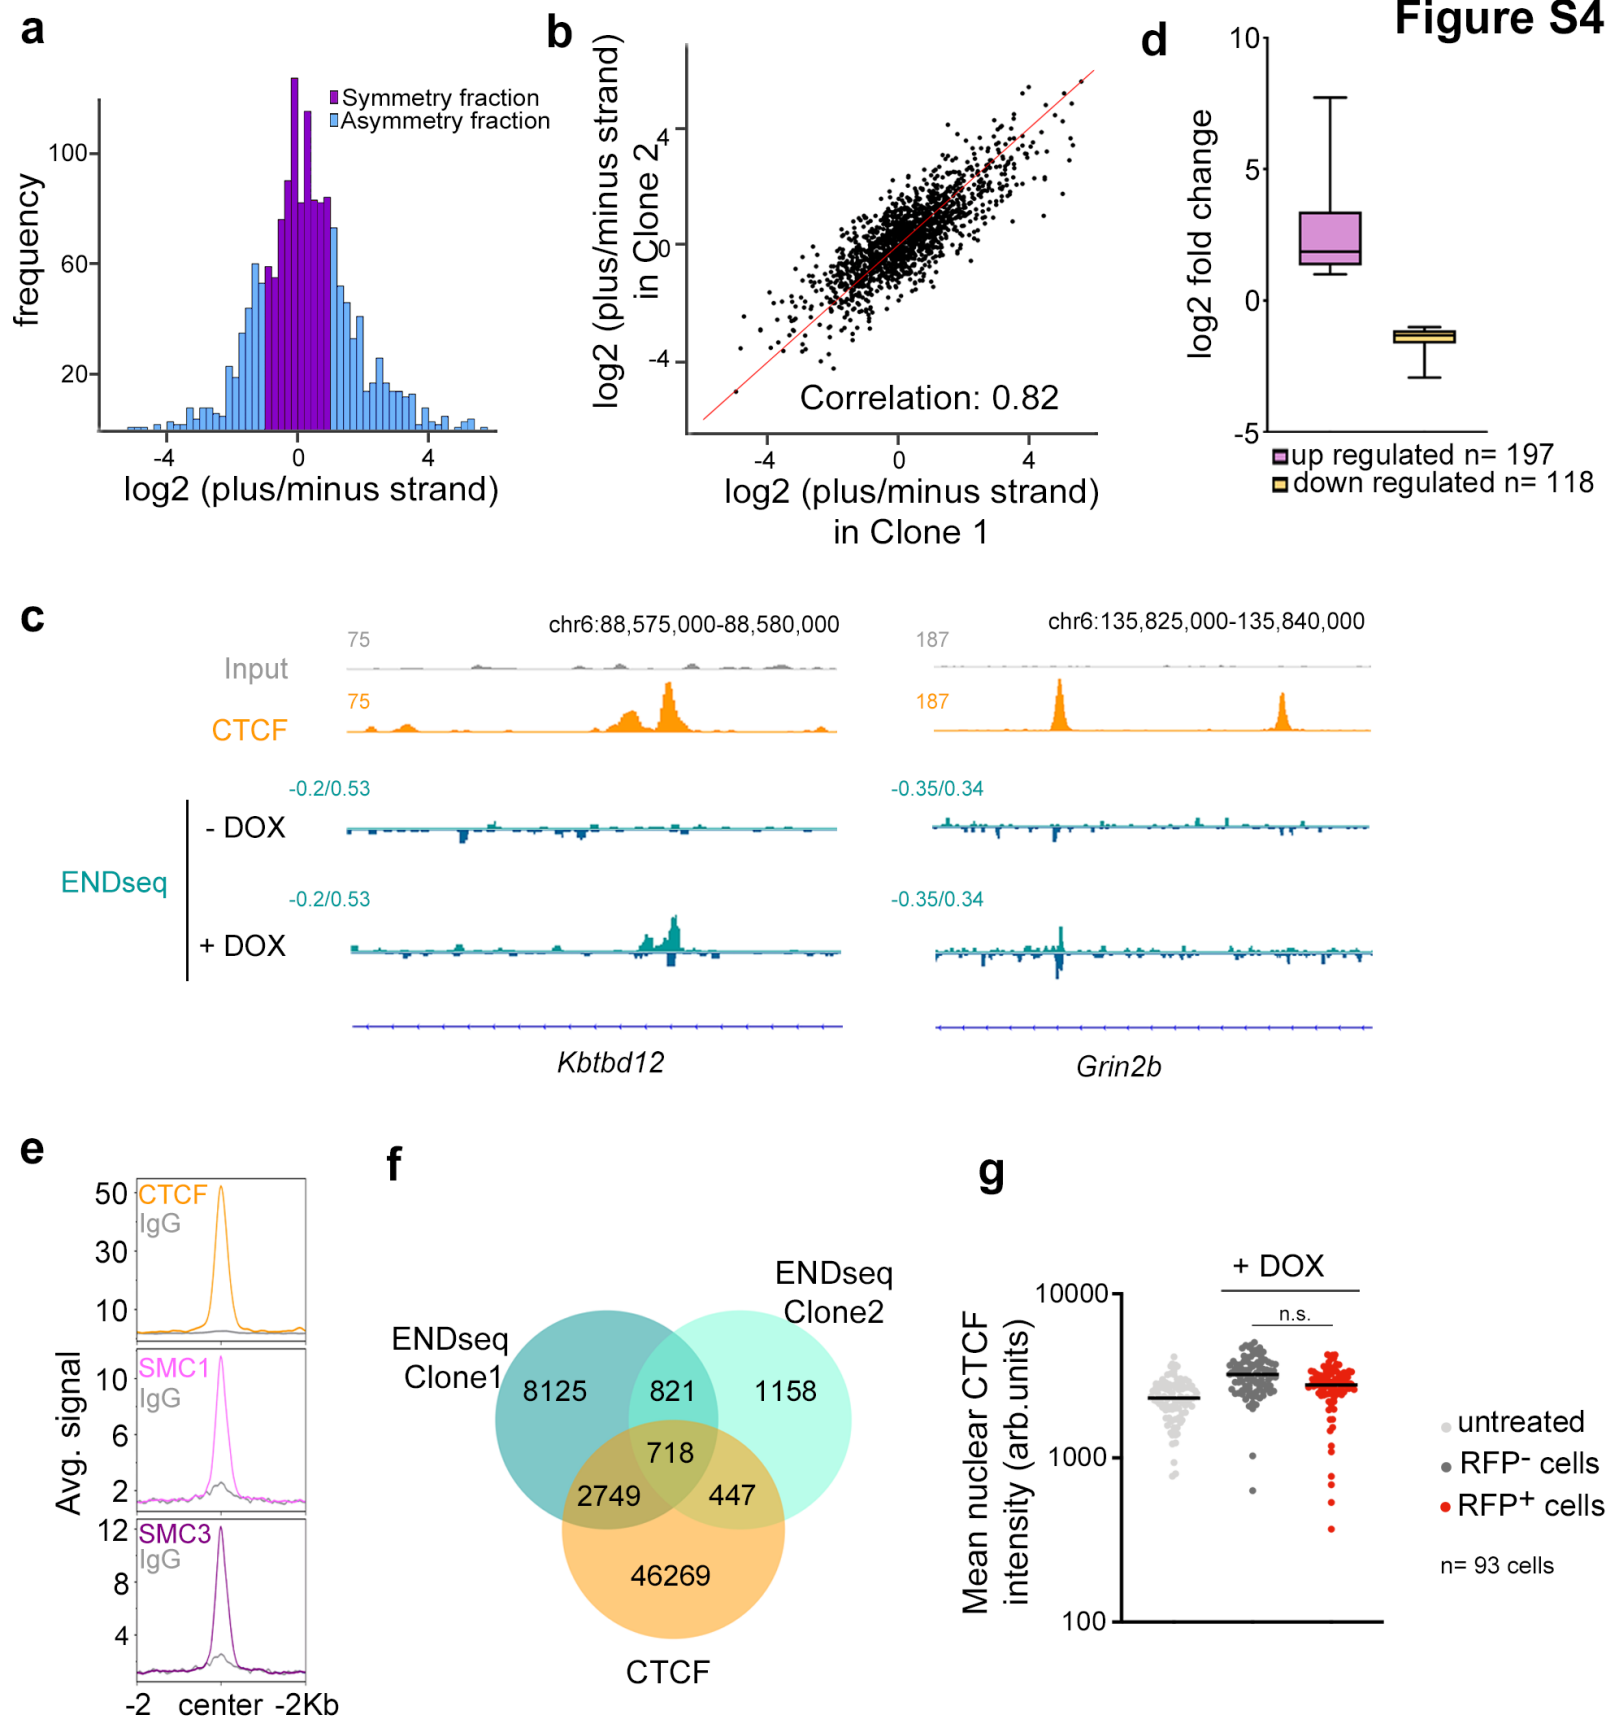

**Supplementary Fig. 4: CTCF is enriched in END-seq sites.**

**a**, Histogram plot showing the frequency of single (asymmetric fraction) or double (symmetric fraction) strand breaks observed within the END-seq peaks. Ratio between the signal intensity per strand was used to define symmetric or asymmetric END-seq peaks. **b**, Plot showing the level of correlation between the type of DNA lesions (single or double strand breaks) observed in two independent ESC<sup>DUX</sup> clones. Pearson correlation value is shown. **c**, Genome browser tracks showing END-seq signal in untreated and 300ng/ml DOX-treated ESC<sup>DUX</sup> at the indicated genome location. One representative single (left panel) or double (right panel) end break is shown. Input (IgG) is shown as a background reference control. **d**, Box and whisker plot showing the relative fold change (log<sub>2</sub>) in genes differentially expressed (a total of 314 genes) between wild-type and DUX-expressing ESC located near END-seq sites (Supplementary Table 5). Center line indicates the median, box extends from the 25<sup>th</sup> to 75<sup>th</sup> percentiles and whiskers show Min to Max values. Data was obtained from<sup>5</sup>. **e**, Plots showing CTCF<sup>20</sup>, SMC1 and SMC3<sup>21</sup> enrichment at the set of 1539 END-seq sites identified in DOX-treated ESC<sup>DUX</sup>. Input (IgG) is also shown as a background reference control. **f**, Venn diagram showing the number of END-seq and CTCF overlapping peaks between the two ESC<sup>DUX</sup> clones analyzed. Peak calling for CTCF binding sites in ESC was obtained from<sup>20</sup>. **g**, HTI quantification of CTCF in untreated or 600ng/ml DOX-treated ESC<sup>DUX</sup> for 24 hours. Cells were split into RFP<sup>+</sup> or RFP<sup>-</sup> subpopulations. Center lines indicate mean values. n=93; n.s.=non-significant in two-tailed unpaired *t*-test. Representative data from one ESC<sup>DUX</sup> clone is shown but two independent clones were analyzed.

Figure S5

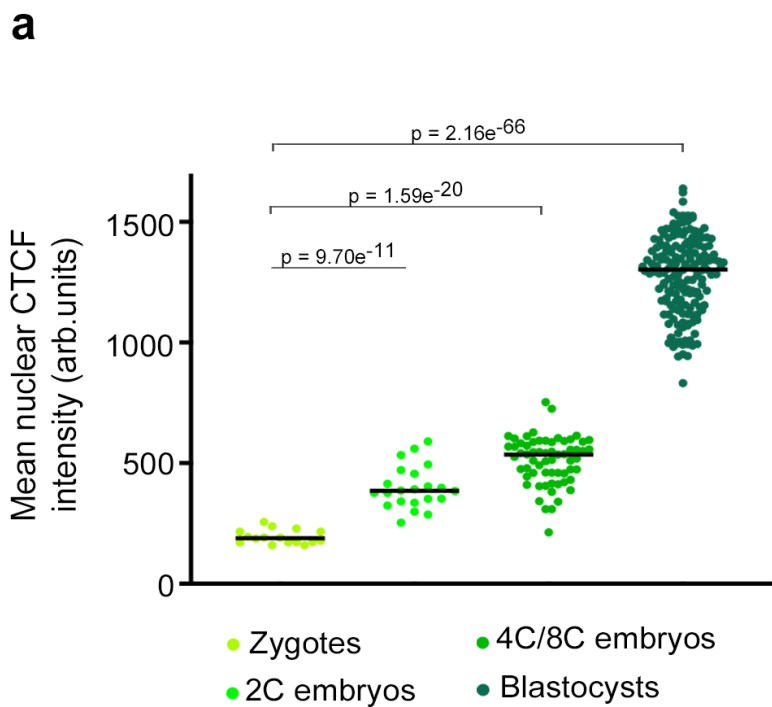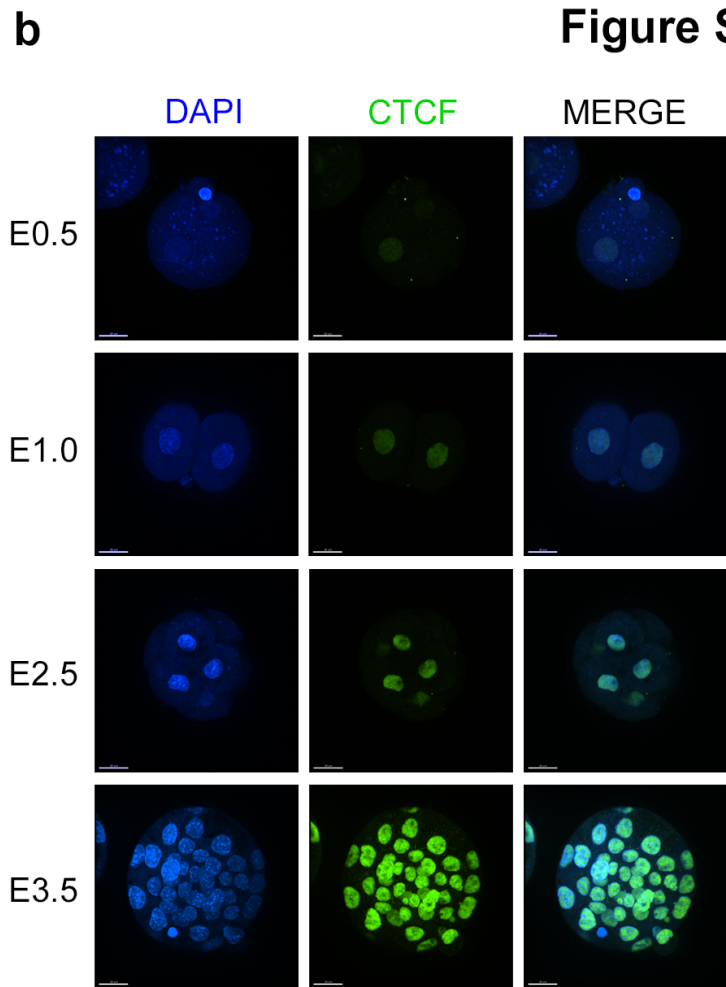

**Supplementary Fig. 5: CTCF expression levels increase during embryonic development. a,** Graph showing CTCF mean nuclear intensity in mouse embryos at different developmental stages, Zygotes (E0.5, 8 embryos), 2C (E1.0, 11 embryos), 4C/8C (E2.5, 14 embryos) and blastocysts (E3.5, 7 embryos). p values are shown from two-tailed unpaired *t*-tests. **b,** Representative images from the mouse embryos described in (a). Scale bar, 20 $\mu$ m.

Figure S6

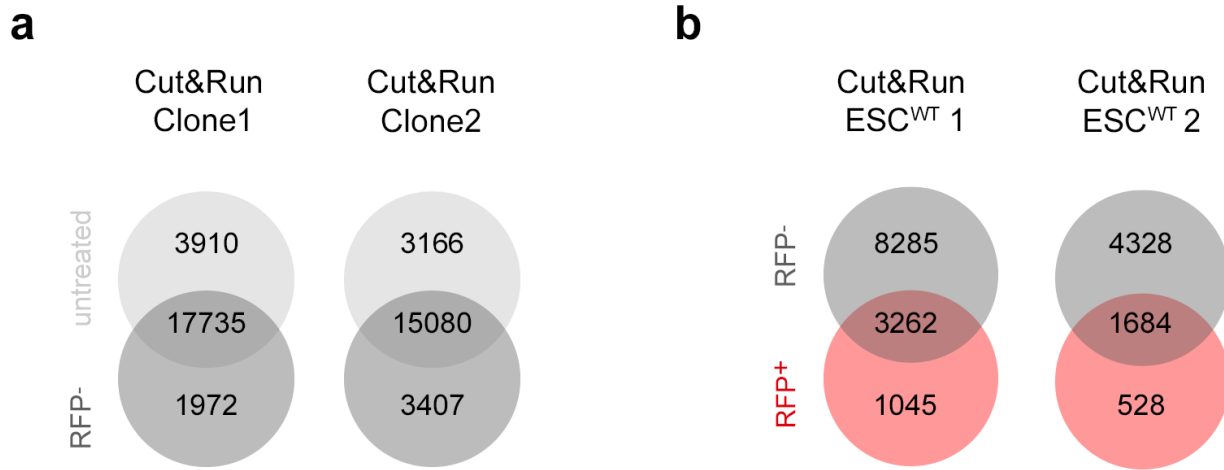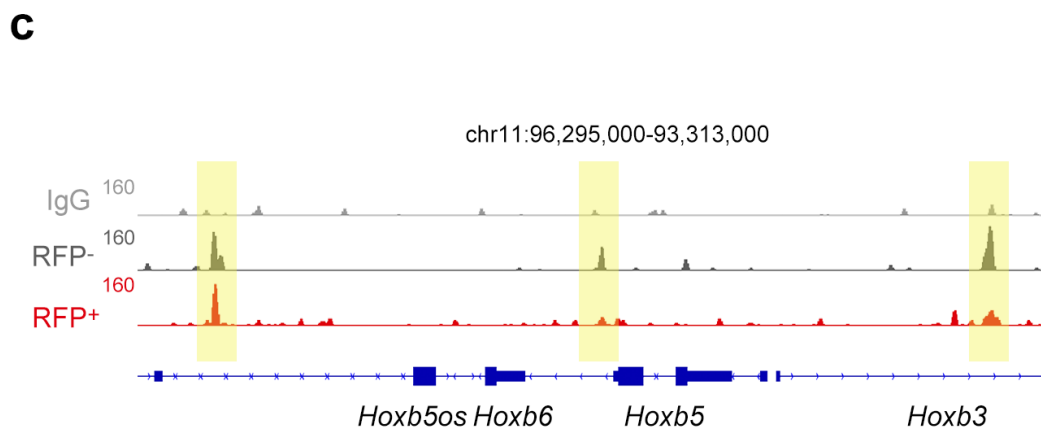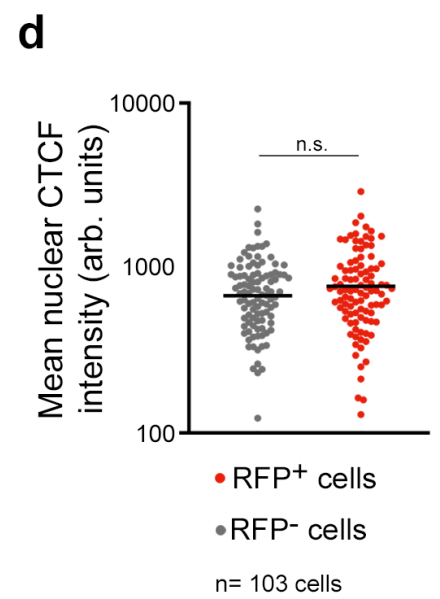

**Supplementary Fig. 6: Endogenous 2C-like cells showed a reorganized CTCF binding landscape.**

**a**, Venn diagram showing the number of CTCF peaks detected in untreated and RFP<sup>-</sup> sorted cells from two independent DOX-treated ESC<sup>DOX</sup> clones. **b**, Venn diagram showing the number of CTCF peaks detected in RFP<sup>-</sup> and RFP<sup>+</sup> sorted cells from two wild type ESC lines. **c**, Genome browser tracks showing CTCF occupancy at the indicated genome location in one representative wild-type cell line. Input (IgG) is shown as a background reference control. **d**, HTI quantification of CTCF in wild-type LTR-RFP reporter ESC. Cells were split into RFP<sup>+</sup> or RFP<sup>-</sup> subpopulations. Center lines indicate mean values. n=103; n.s.=non-significant in two-tailed unpaired *t*-test. Representative data from one wild-type ESC clone is shown but two independent clones were analyzed.

Figure S7

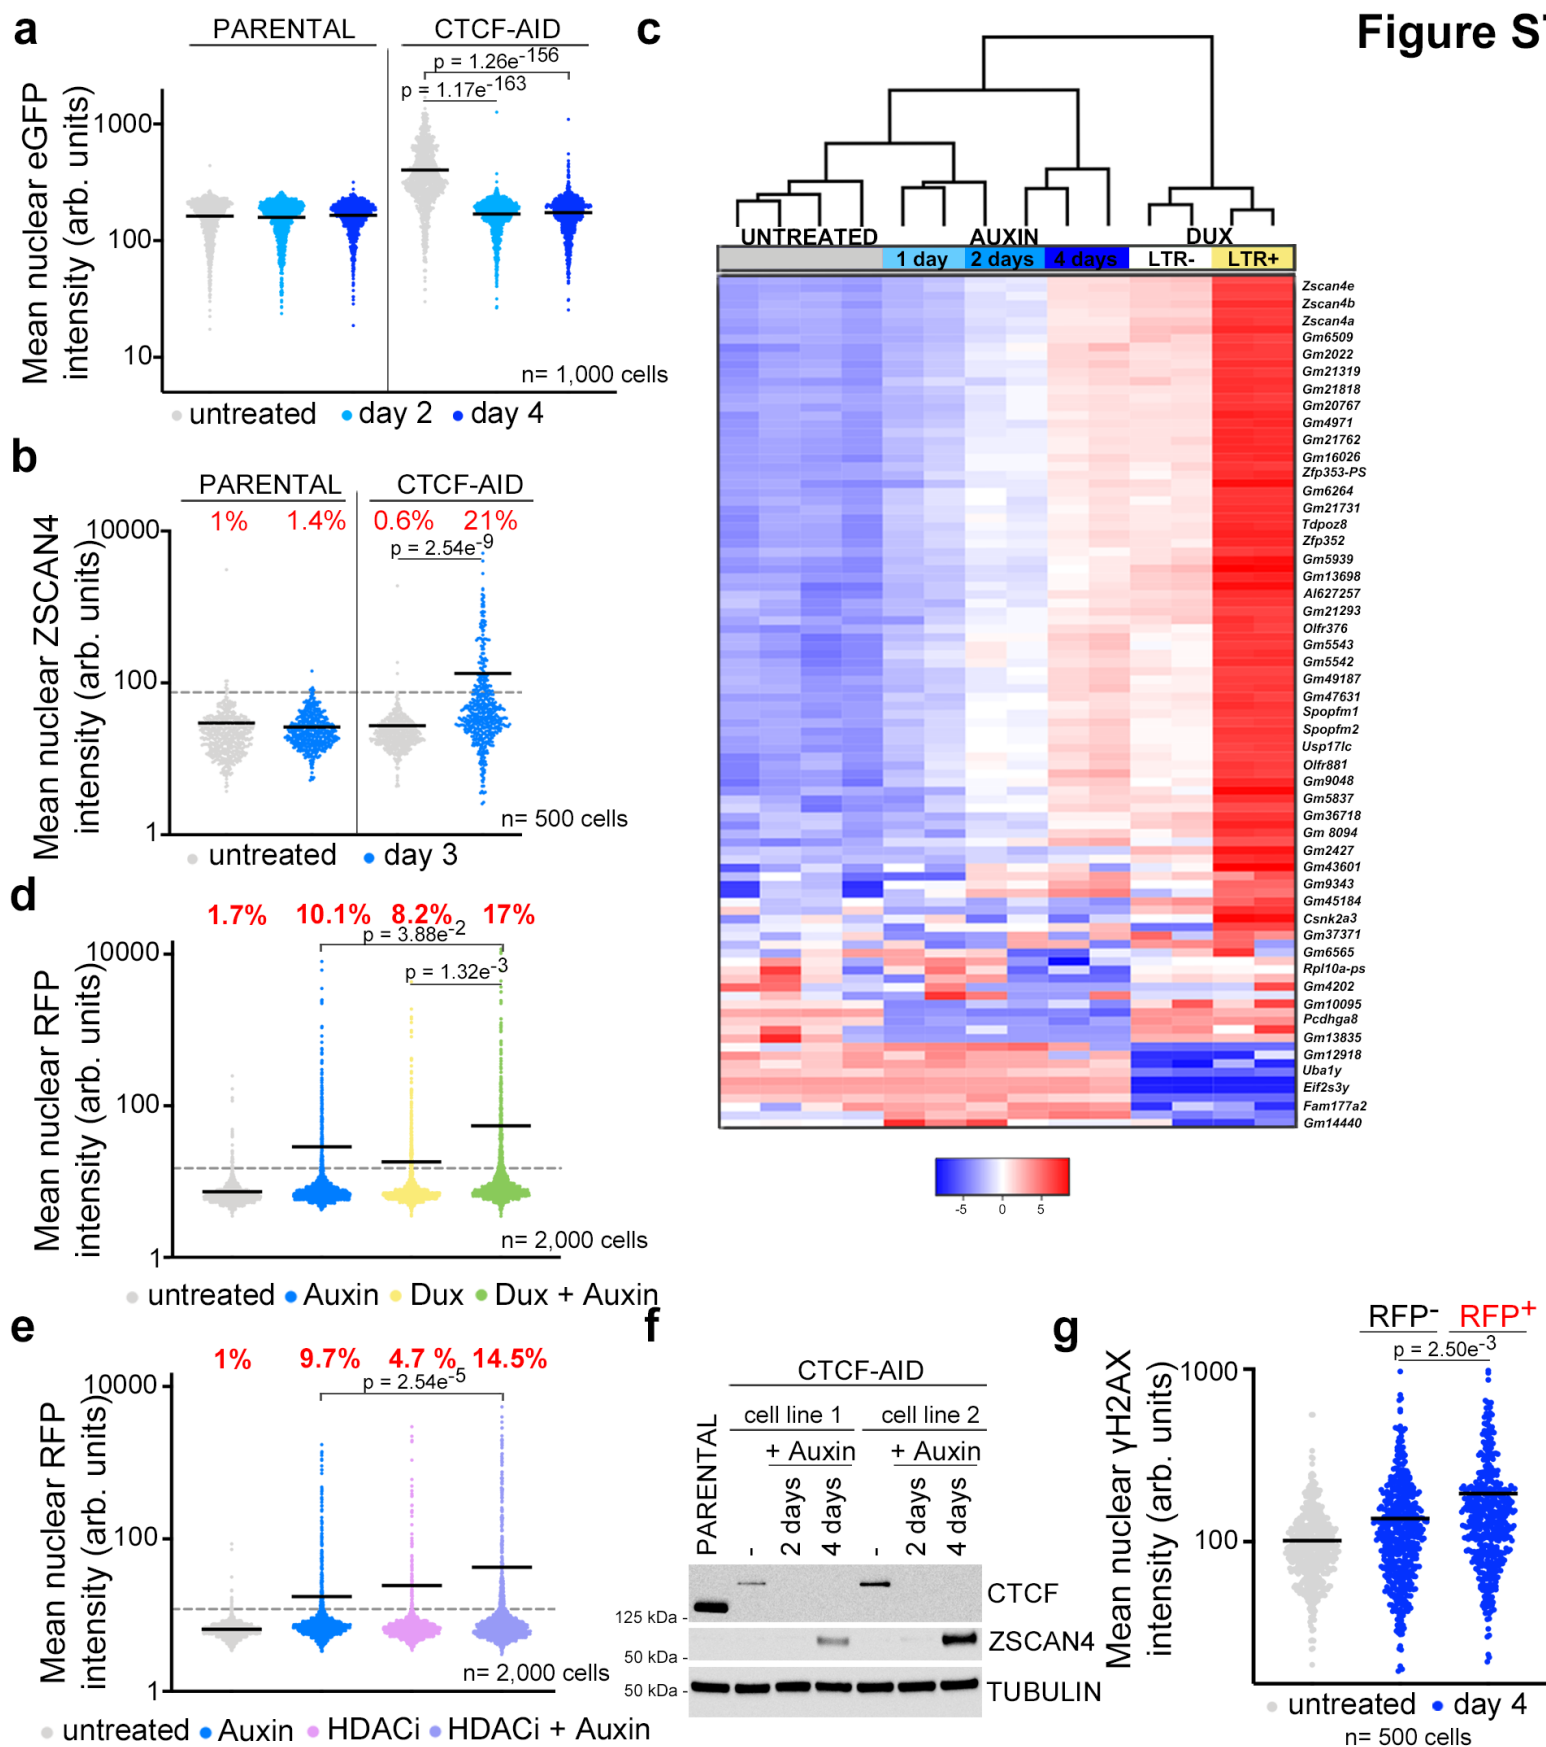

**Supplementary Fig. 7: CTCF depletion induces spontaneous 2C-like conversion in ESC.** **a**, HTI quantification of GFP in untreated or auxin-treated for two and four days parental and ESC<sup>CTCF-AID</sup>. Center lines indicate mean values. n=1000; p values are shown from two-tailed unpaired *t*-tests. **b**, HTI quantification of ZSCAN4<sup>+</sup> cells in untreated or auxin-treated for three days parental and ESC<sup>CTCF-AID</sup>. Center lines indicate mean values. Percentages of ZSCAN4<sup>+</sup> cells above the threshold are indicated. n=500; p values are shown from two-tailed unpaired *t*-tests. **c**, Heatmap generated from RNAseq data from untreated or auxin-treated ESC<sup>CTCF-AID</sup> at different time points<sup>23</sup> together with wild-type or DUX-expressing ESC<sup>5</sup>. DUX-expressing ESC were sorted in GFP<sup>+</sup> or GFP<sup>-</sup> as a result of the activation of the LTR-GFP reporter<sup>5</sup>. Heatmap shows the top 50 most differentially expressed genes. Note that auxin-treated ESC<sup>CTCF-AID</sup> for four days still contain a high number of non-reprogrammed ESC. **d, e** HTI quantification of RFP<sup>+</sup> cells in untreated or auxin-treated for four days *LTR-RFP* reporter ESC<sup>CTCF-AID</sup> expressing DUX (**d**) or treated with a histone deacetylase inhibitor (**e**) where indicated. ESC<sup>CTCF-AID</sup> were infected with pCW57.1-mDUX-CA (Addgene 99284) and induced with 300ng/ml DOX. Center lines indicate mean values. n=2000; p values are shown from two-tailed unpaired *t*-tests. Percentages of RFP<sup>+</sup> cells above the threshold are indicated. **f**, Western blot analysis of the indicated proteins performed in two newly generated KH2-ESC<sup>CTCF-AID</sup> treated with auxin for 2 and 4 days. Parental ESC were used to show the smaller size and higher levels of CTCF. Tubulin levels are shown as a loading control. Two ESC cell lines are shown but 4 ESC lines from 2 different genetic backgrounds were generated and confirmed. **g**, HTI quantification of  $\gamma$ H2AX in untreated or auxin-treated for four days in *LTR-RFP* reporter ESC<sup>CTCF-AID</sup>. Auxin-treated cells were split based in RFP<sup>+</sup> and RFP<sup>-</sup>. Center lines indicate mean values. n=500; p values are shown from two-tailed unpaired *t*-tests. For **(a)**, **(b)**, **(d)**, **(e)**, **(f)**



and (g), three (a, b and g) or two (d, e and f) independent experiments were performed with similar results but one representative experiment is shown.

**Figure S8**

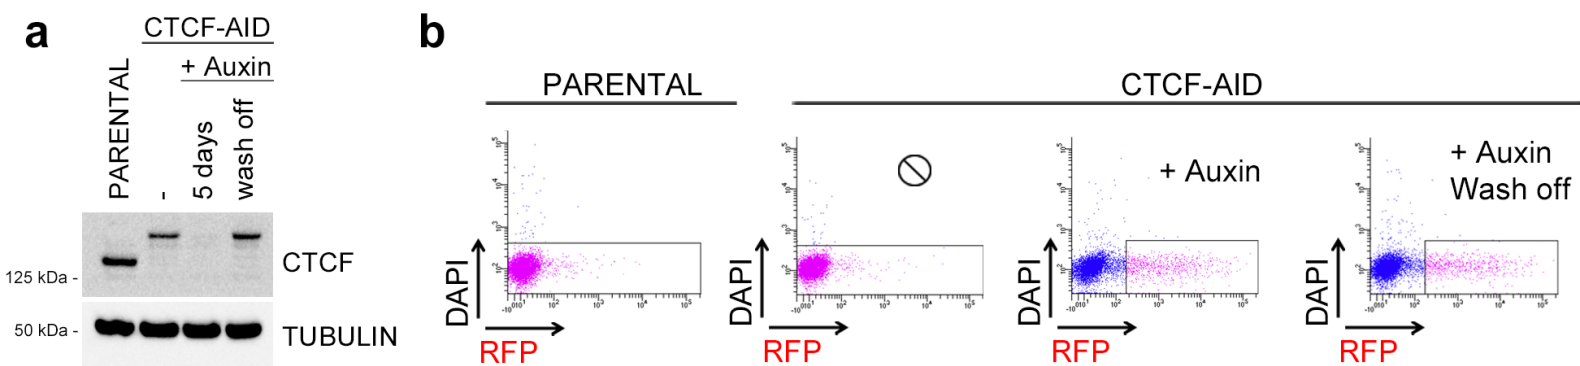

**Supplementary Fig. 8: Re-expression of CTCF promotes silencing of the transcriptional 2C-program.** **a**, Western blot analysis of CTCF performed in untreated or auxin-treated for five days in parental ESC or ESC<sup>CTCF-AID</sup>. Wash off sample include ESC<sup>CTCF-AID</sup> treated four days with auxin plus 18 hours without auxin. Tubulin levels are shown as a loading control.  $\emptyset$ =No treatment. **b**, Flow cytometry plots generated from samples described in **(a)**. Gating shows the actual RFP<sup>+</sup> cells sorted for the experiment. For **(a and b)** two independent experiments were performed with similar results but one representative is shown.

**Figure S9**

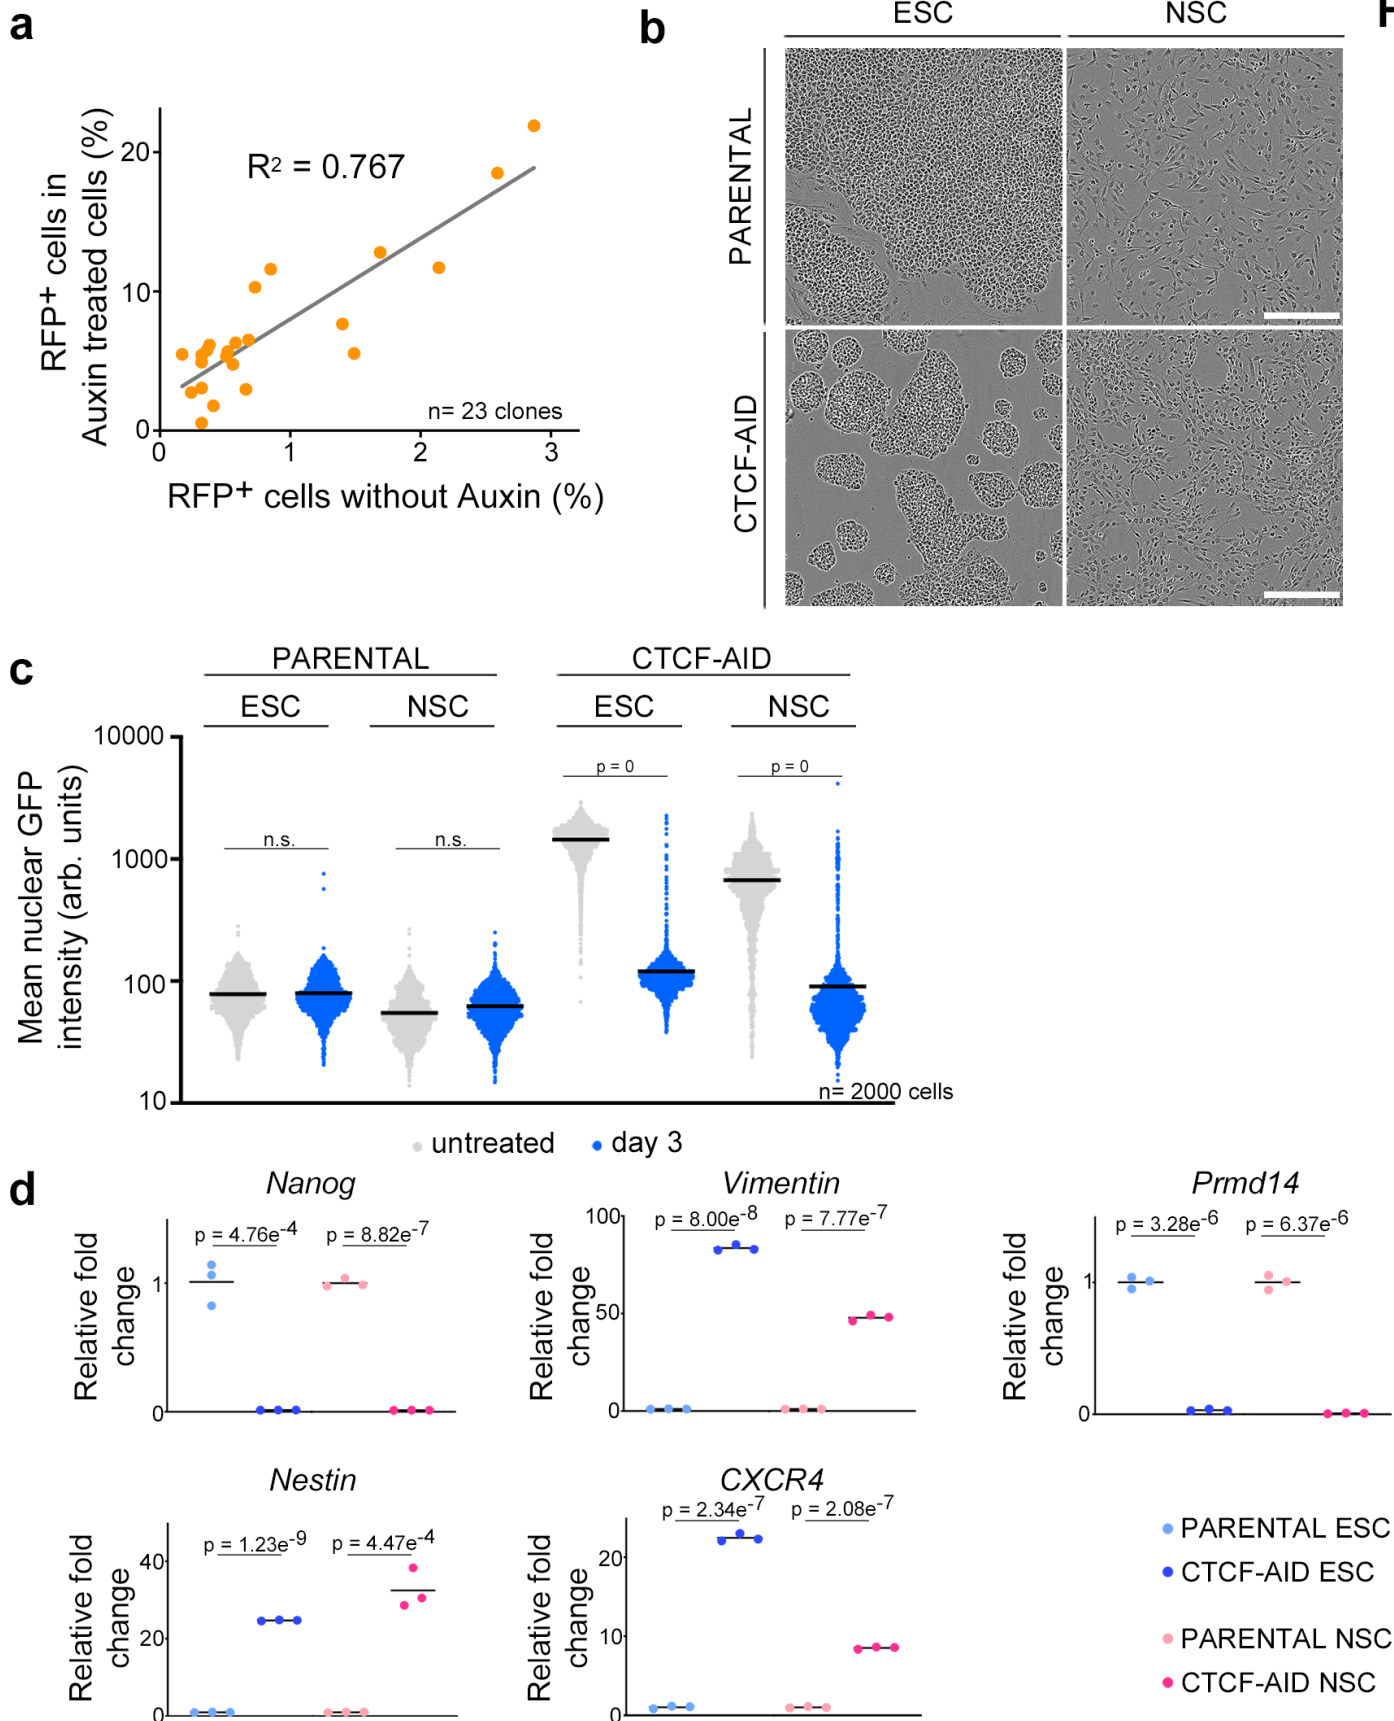

**Supplementary Fig. 9: Epigenetic and/or transcriptional roadblocks prevent 2C-like conversion in CTCF-depleted ESC<sup>CTCF-AID</sup>.** **a**, Graph showing the percentage of endogenous 2C-like cells in a total of 23 subclonal ESC lines derived from the parental ESC<sup>CTCF-AID</sup>. Cells were untreated or auxin-treated for four days. A linear regression analysis was performed, and the regression coefficient (R) is shown. **b**, Representative bright-field images from paraformaldehyde-fixed ESC, NSC, ESC<sup>CTCF-AID</sup> and NSC<sup>CTCF-AID</sup>. Scale bar, 200 $\mu$ m. **c**, HTI quantification of GFP in ESC, NSC, ESC<sup>CTCF-AID</sup> and NSC<sup>CTCF-AID</sup> untreated or treated with auxin for four days. Center lines indicate mean values. p values are shown from two-tailed unpaired *t*-tests. n.s.= non-significant. Three independent experiments were performed but one representative is shown. **d**, Graphs showing the relative fold change (log<sub>2</sub>) expression of pluripotent genes expressed in ESC (*Nanog* and *Prdm14*) and NSC associated markers (*Cxcr4*, *Nestin* and *Vimentin*) in ESC, NSC, ESC<sup>CTCF-AID</sup> and NSC<sup>CTCF-AID</sup>. p values are shown from two-tailed unpaired *t*-tests. Center line indicates the mean. Reactions were performed by triplicate in two independent experiments.

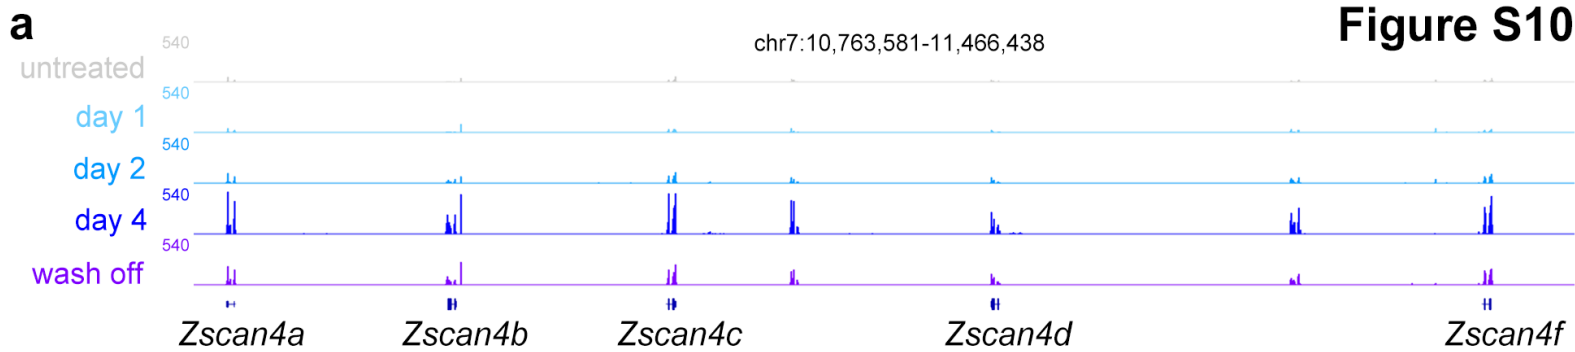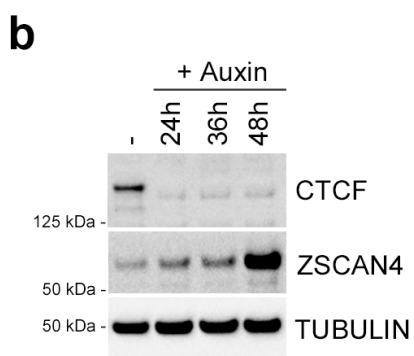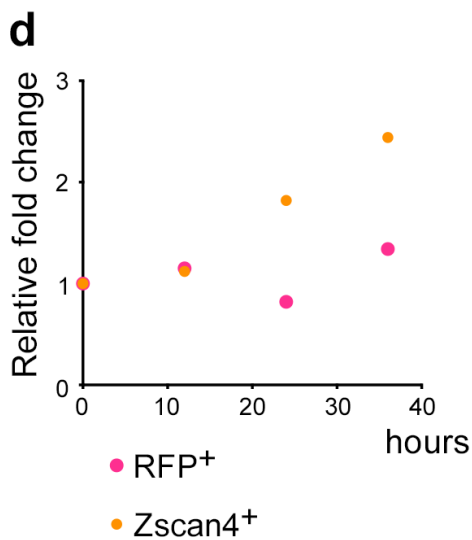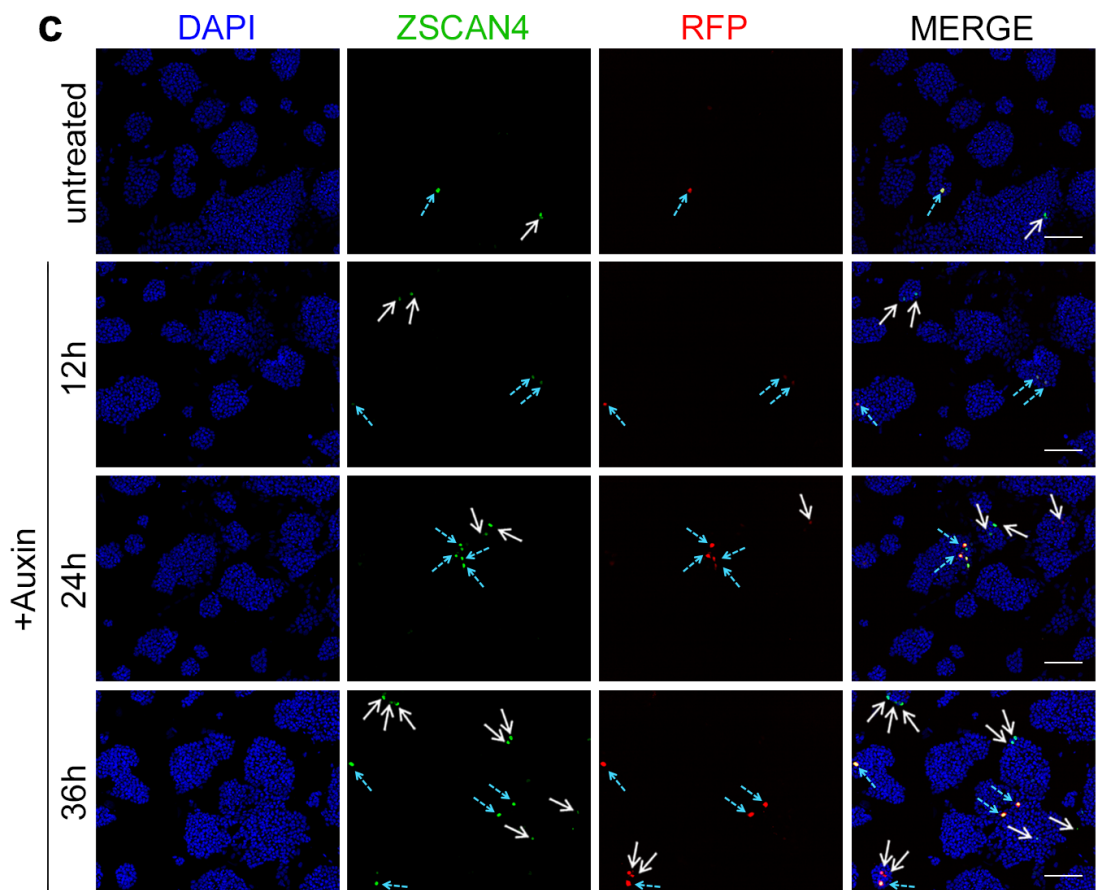

**Supplementary Fig. 10: ZSCAN4 expression is necessary for efficient 2C-like conversion upon CTCF depletion.** **a**, Genome browser tracks showing RNAseq RPKM read count at the ZSCAN4 cluster in the indicated samples. **b**, Western blot analysis of CTCF and ZSCAN4 performed in untreated or auxin-treated for the indicated hours in ESC<sup>CTCF-AID</sup>. Tubulin levels are shown as a loading control. **c**, Representative immunofluorescence images from ESC<sup>CTCF-AID</sup> treated with auxin for one or two days showing ZSCAN4<sup>+</sup> cells and ZSCAN4<sup>+</sup>; LTR-RFP<sup>+</sup> cells. Scale bar, 200 $\mu$ m. White arrows indicate single ZSCAN4<sup>+</sup> or LTR-RFP<sup>+</sup> cells. Blue dashed arrows indicate double ZSCAN4<sup>+</sup>; LTR-RFP<sup>+</sup> cells. **d**, Graph showing the relative fold-change in the number of ZSCAN4<sup>+</sup> or LTR-RFP<sup>+</sup> cells related to time=0 (untreated ESC<sup>CTCF-AID</sup>) at the indicated timepoints (12, 24 and 36 hours) after the addition of auxin. Average value from triplicates is shown. In **(b-d)** two independent experiments were performed but only one representative is shown.

**Figure S11**

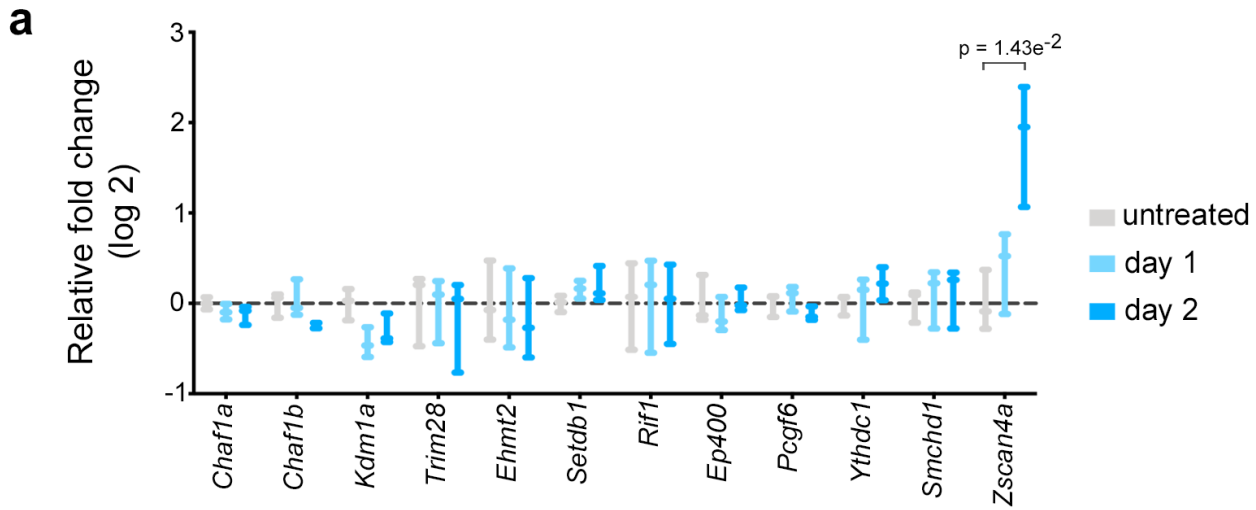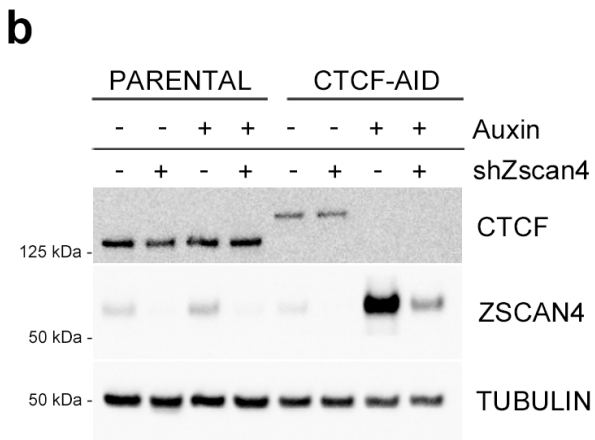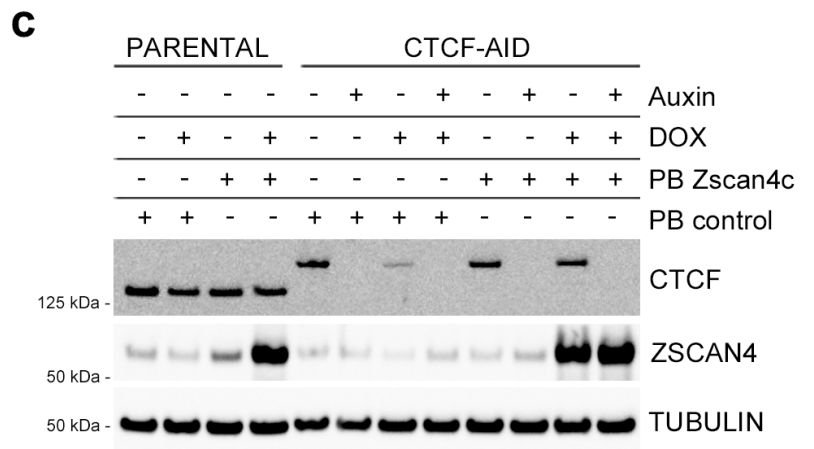



**Supplementary Fig. 11:**

**a**, Graph showing the relative fold change (log<sub>2</sub>) in the expression of the indicated known regulators involved in 2C-like conversion in ESC<sup>CTCF-AID</sup> untreated or auxin-treated for one or two days. Three independent values per gene are shown. Data was obtained from RNAseq datasets<sup>27</sup>. p value is shown from two-tailed unpaired *t*-test. **b**, Western blot analysis of CTCF and ZSCAN4 performed in untreated or auxin-treated for four days in parental ESC or ESC<sup>CTCF-AID</sup>. ESC were infected with lentiviruses expressing siRNAs against ZSCAN4 where indicated. Tubulin levels are shown as a loading control. **c**, Western blot analysis of CTCF and ZSCAN4 performed in untreated or auxin-treated for four days in parental ESC or ESC<sup>CTCF-AID</sup>. ESC were transfected with PiggyBac (PB) control or expressing ZSCAN4 where indicated. 1μg/ml DOX was added to induce PB-induced expression. Tubulin levels are shown as a loading control. For **(b and c)** two independent experiments with similar results were performed but only one representative is shown.

**Supplementary Table 1: List of primers.**

| <b>Primers (qPCR)</b>                                           | forward                                                                            | reverse               |
|-----------------------------------------------------------------|------------------------------------------------------------------------------------|-----------------------|
| DUX                                                             | GGAGTGAGAGGCAGATCAGG                                                               | CTGCTGACCGAAGTCCAAC   |
| ZSCAN4C                                                         | TCTTTCTGGTTGGCAGCTTT                                                               | GCCAGGCTTCTGTCAAGAAC  |
| ZFP352                                                          | AAGGTCCCACATCTGAAGAA                                                               | GGGTATGAGGATTCACCCA   |
| TCSTV3                                                          | ACCAGCTGAAACATCCATCC                                                               | CCATGGATCCCTGAAGGTAA  |
| SP110                                                           | CACCTGCAAACAAGAAAGCA                                                               | AACTCCATGTCCAGGTGAGG  |
| TDPOZ1                                                          | GCCCTTGATTTCAATGCCTA                                                               | CACTTTCGGCTCCAAGAAAG  |
| DUB1                                                            | GCCTTCAAGTGCACAGACAA                                                               | GATGTCCAGGAAGCGATCAT  |
| EIF1Ad8 (GM8300)                                                | AACAGGCGCAGAGGTAAGAAA                                                              | GCACAGCCTCCTTACACCAT  |
| NANOG                                                           | CAGGTGTTTGAGGGTAGCTC                                                               | CGGTTTCATCATGGTACAGTC |
| PRDM14                                                          | CACTCCCGAAGTACCACGAT                                                               | CCCACCTCTGACCACTGATT  |
| VIMENTIN                                                        | TGAAGGAAGAGATGGCTCGT                                                               | TCCAAGCAGCTTCTGTAGGT  |
| NESTIN                                                          | CTCGAGCAGGAAGTGGTAGG                                                               | GCCTCTTTGGTTCCTTTCC   |
| CXCR4                                                           | GGGTCATCAAGCAAGGATGT                                                               | GGCAGAGCTTTTGAAGTTGG  |
|                                                                 |                                                                                    |                       |
|                                                                 |                                                                                    |                       |
| <b>Primers (Cloning)</b>                                        |                                                                                    |                       |
| LTR-NotI-F (Cloning LTR sequences into the PiggyBac construct)  | CGATGCGGCCGCGCTGTAGTGGTTATTCTGGTTGTC                                               |                       |
| LTR-EcoRI-R (Cloning LTR sequences into the PiggyBac construct) | CGGAGAATTCAAGCTTTGTGCACTGAATCACCT                                                  |                       |
| mDUX-FLAG-MfeI-F (Cloning DUX into pBS31)                       | GGCATCAATTGACCATGGACTACAAGGATGACGACGATAAGGGCAGCGGAGCTGAG<br>GCTGGCTCTCCAGTGGGAGGAT |                       |
| mDUX-FLAG-MfeI-R (Cloning DUX into pBS31)                       | GGCATCAATTGTTACAGCATGTCAAGAAGGGTCTGGTACTC                                          |                       |
|                                                                 |                                                                                    |                       |
